# Supplementary material for: Pan-Genome Analyses of the Genus Cohnella and Proposal of the Novel Species Cohnella silvisoli sp. nov., Isolated from Forest Soil
Source: MDPI journal article supplement (doi:10.3390/microorganisms11112726), 2023-11-08
Supplement: s1 [file s1]

## Supplementary data

# Pan-Genome Analyses of the Genus *Cohnella* and Proposal of the Novel Species *Cohnella silvisoli* sp. nov., Isolated from Forest Soil

Chunling Wang <sup>1</sup>, Lutian Mao <sup>1</sup>, Gegen Bao <sup>2</sup> and Honghui Zhu <sup>3,\*</sup>

<sup>1</sup> College of Life Science, Huizhou University, Huizhou 516007, China; wangcl@hzu.edu.cn (C.W.); mlt@hzu.edu.cn (L.M.)

<sup>2</sup> Guangzhou Key Laboratory for Research and Development of Crop Germplasm Resources, Zhongkai University of Agriculture and Engineering, Guangzhou 510225, China; baogegen@126.com

<sup>3</sup> Key Laboratory of Agricultural Microbiomics and Precision Application (MARA), Provincial Key Laboratory of Microbial Culture Collection and Application, Key Laboratory of Agricultural Microbiome (MARA), State Key Laboratory of Applied Microbiology Southern China, Institute of Microbiology, Guangdong Academy of Sciences, Guangzhou 510642, China

\* Correspondence: zhuhh\_gdim@163.com; Tel.: +86-020-87685669

**Subject Category:** New Taxa (*Firmicutes*)

**Article Type:** Taxonomic Descriptions

**Abbreviations:** GDMCC, Guangdong Microbial Culture Collection Center; JCM, Japan Collection of Microorganism; LMG, Belgian Co-ordinated Collections of Micro-organisms; NRRL, Agricultural Research Service Culture Collection; ANI, Average Nucleotide Identity; dDDH, the Digital DNA-DNA Hybridization; UBCG, Up-to-date Bacterial Core Gene set; DPG, diphosphatidylglycerol; PE, phosphatidylethanolamine; PG, phosphatidylglycerol; APL, unidentified aminophospholipid.

**Figure S1.** The neighbor-joining tree based on 16S rRNA gene sequences constructed revealing the phylogenetic position of strain NL03-T5<sup>T</sup>, NL03-T5-1 and its closely related species of the genus *Cohnella*. Only the bootstrap values (represented percentages of 1000 replication) >50% are shown. GeneBank accession numbers are shown in parentheses. Bar, 0.005 substitutions per nucleotide position.

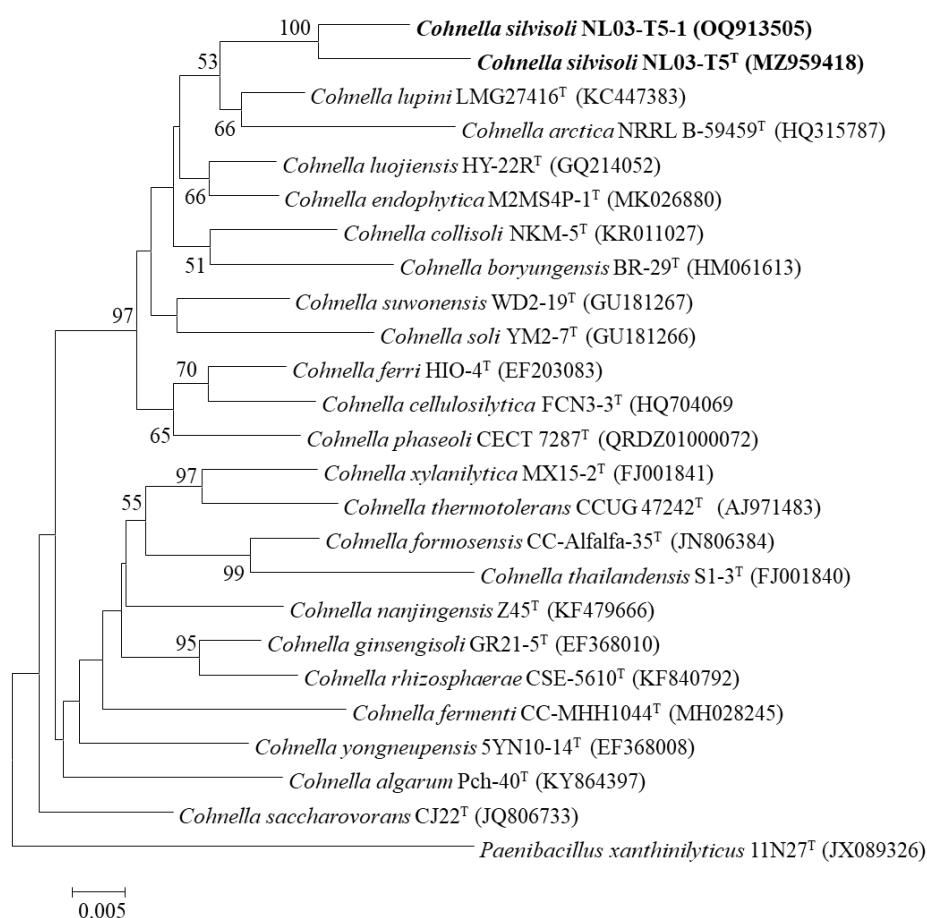

**Figure S2.** The minimum evolution tree based on 16S rRNA gene sequences constructed indicating the relationship of strain NL03-T5<sup>T</sup>, NL03-T5-1 and its closely related species of the genus *Cohnella*. Bootstrap values (represented percentages of 1000 replication) >50% are shown at nodes. GenBank accession numbers are shown in parentheses. Bar, 0.005 substitutions per nucleotide position.

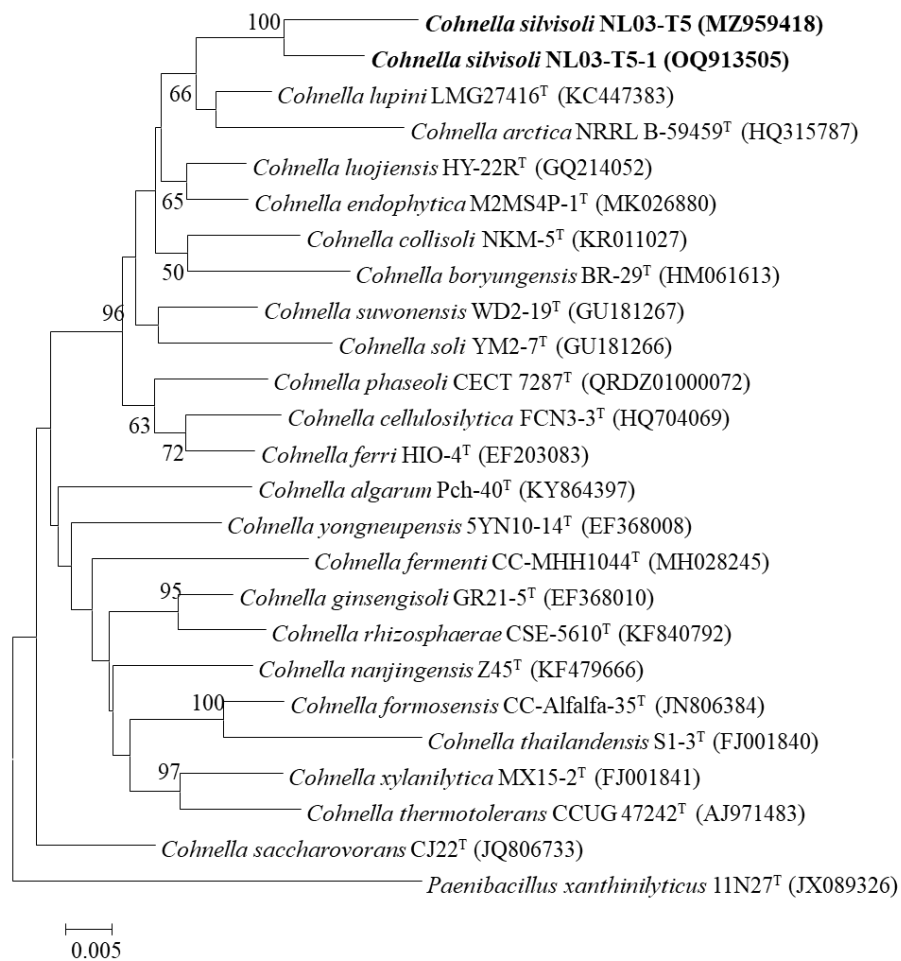

**Figure S3.** Two-dimensional thin-layer chromatograms of the polar lipids of strain NL03-T5<sup>T</sup> and its closely related species, *C. lupini* LMG 27416<sup>T</sup> and *C. arctica* NRRL B-59459<sup>T</sup>, by spraying with 5% ethanolic molybdotophosphoric acid and heating them at 140°C for 15 min. Abbreviations: DPG, diphosphatidylglycerol; PE, phosphatidylethanolamine; PG, phosphatidylglycerol; APL, unidentified aminophospholipid.

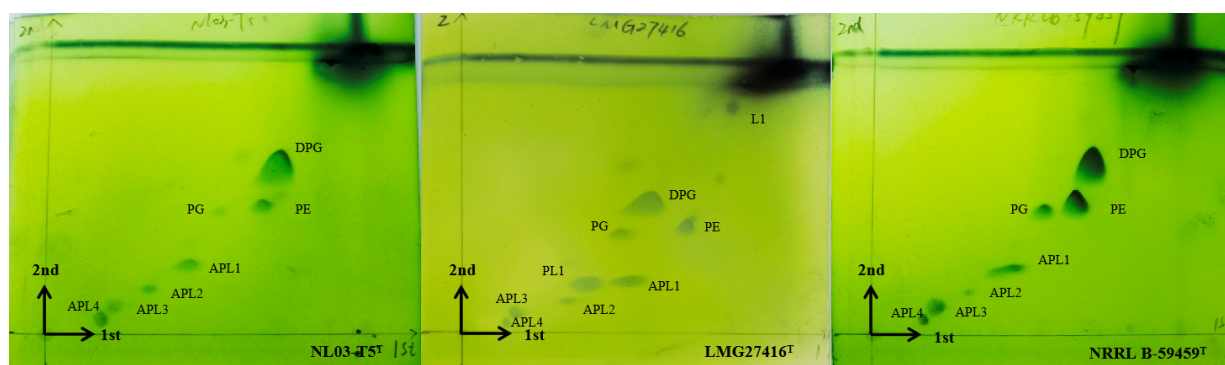

**Figure S4.** Total CAZymes in the various families, predicted in NL03-T5<sup>T</sup> genome.

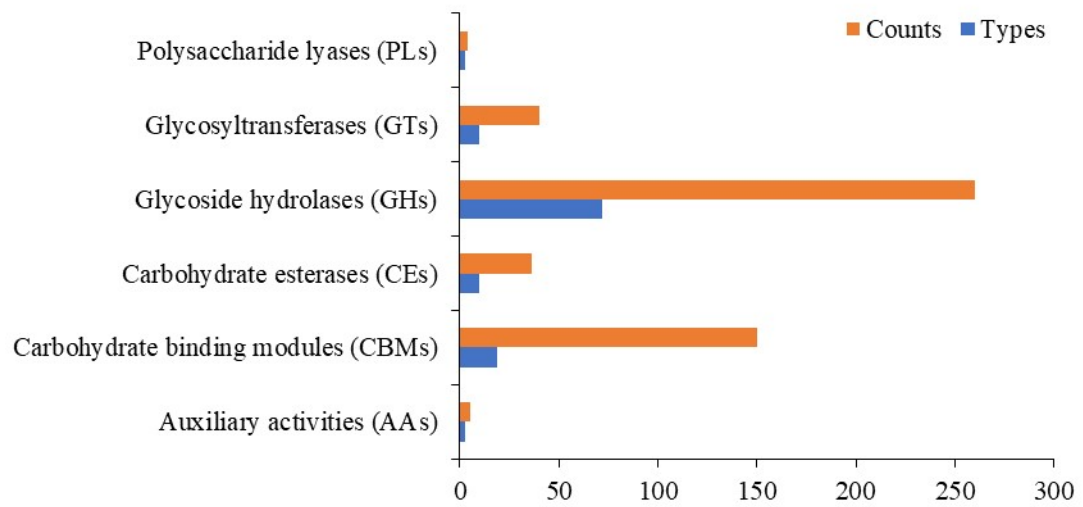

**Table S1.** Genome characteristics of *Cohnella silvisoli* NL03-T5<sup>T</sup> and NL03-T5-1.

| Characteristics                                    | NL03-T5 <sup>T</sup> | NL03-T5-1        |
|----------------------------------------------------|----------------------|------------------|
| Accession No.                                      | JAIOAP0000000000     | JASKHM0000000000 |
| Size (Mbp)                                         | 7.44                 | 7.44             |
| No. of contigs                                     | 43                   | 41               |
| %GC content                                        | 49.2                 | 49.2             |
| No. Of coding sequences                            | 6853                 | 6860             |
| L50 (bp)                                           | 8                    | 9                |
| N50 (bp)                                           | 310309               | 310325           |
| Number of RNAs                                     | 67                   | 66               |
| Completeness (%)                                   | 91.2                 | 92.5             |
| Contamination (%)                                  | 15.4                 | 14.1             |
| <b>Number of genes related to (RAST):</b>          |                      |                  |
| Cofactors, vitamins, prosthetic groups, pigments   | 138                  | 138              |
| Cell wall and capsule                              | 55                   | 55               |
| Virulence, disease, and defense                    | 56                   | 55               |
| Potassium metabolism                               | 7                    | 7                |
| Miscellaneous                                      | 11                   | 11               |
| Phages, prophages, transposable elements, plasmids | 9                    | 9                |
| Membrane transport                                 | 23                   | 24               |
| Iron acquisition and metabolism                    | 19                   | 19               |
| RNA metabolism                                     | 55                   | 55               |
| Nucleosides and nucleotides                        | 96                   | 96               |
| Protein metabolism                                 | 145                  | 145              |
| Cell division and cell cycle                       | 6                    | 6                |
| Motility and chemotaxis                            | 19                   | 19               |
| Regulation and cell signaling                      | 17                   | 17               |
| Secondary metabolism                               | 6                    | 6                |
| DNA metabolism                                     | 79                   | 79               |
| Fatty acids, lipids, and isoprenoids               | 40                   | 41               |
| Nitrogen metabolism                                | 8                    | 8                |
| Dormancy and sporulation                           | 25                   | 25               |
| Respiration                                        | 60                   | 60               |
| Stress response                                    | 39                   | 39               |
| Metabolism of aromatic compounds                   | 15                   | 15               |
| Amino acids and derivatives                        | 268                  | 248              |
| Sulfur metabolism                                  | 17                   | 17               |
| Phosphorus metabolism                              | 52                   | 52               |
| Carbohydrates                                      | 287                  | 287              |
| <b>Region (antiSMASH):</b>                         | <b>Type</b>          | <b>Type</b>      |
| 1.1                                                | resorcinol           | resorcinol       |
| 2.1                                                | RiPP-like            | RiPP-like        |
| 2.2                                                | NRPS                 | NRPS             |

|      |             |             |
|------|-------------|-------------|
| 5.1  | terpene     | terpene     |
| 17.1 | RiPP-like   | RiPP-like   |
| 24.1 | terpene     | terpene     |
| 25.1 | NRPS        | NRPS        |
| 29.1 | phosphonate | phosphonate |
| 37.1 | NRPS        | NRPS        |
